# Supplementary material
Source: PubMed Central journal article supplement (PMC3524380)
Supplement: NIHMS416200-supplement-esi.pdf [file NIHMS416200-supplement-esi.pdf]

# Multi-Armed Cationic Cyclodextrin:Poly(ethylene glycol) Polyrotaxanes as Efficient Gene Silencing Vectors

Aditya Kulkarni, Kyle DeFrees, Ryan A. Schuldt, Alexander Vlahu, Ross VerHeul, Seok-Hee Hyun, Wei Deng, and David H. Thompson\*

## NMR Spectra of Multi-Armed Polyrotaxanes

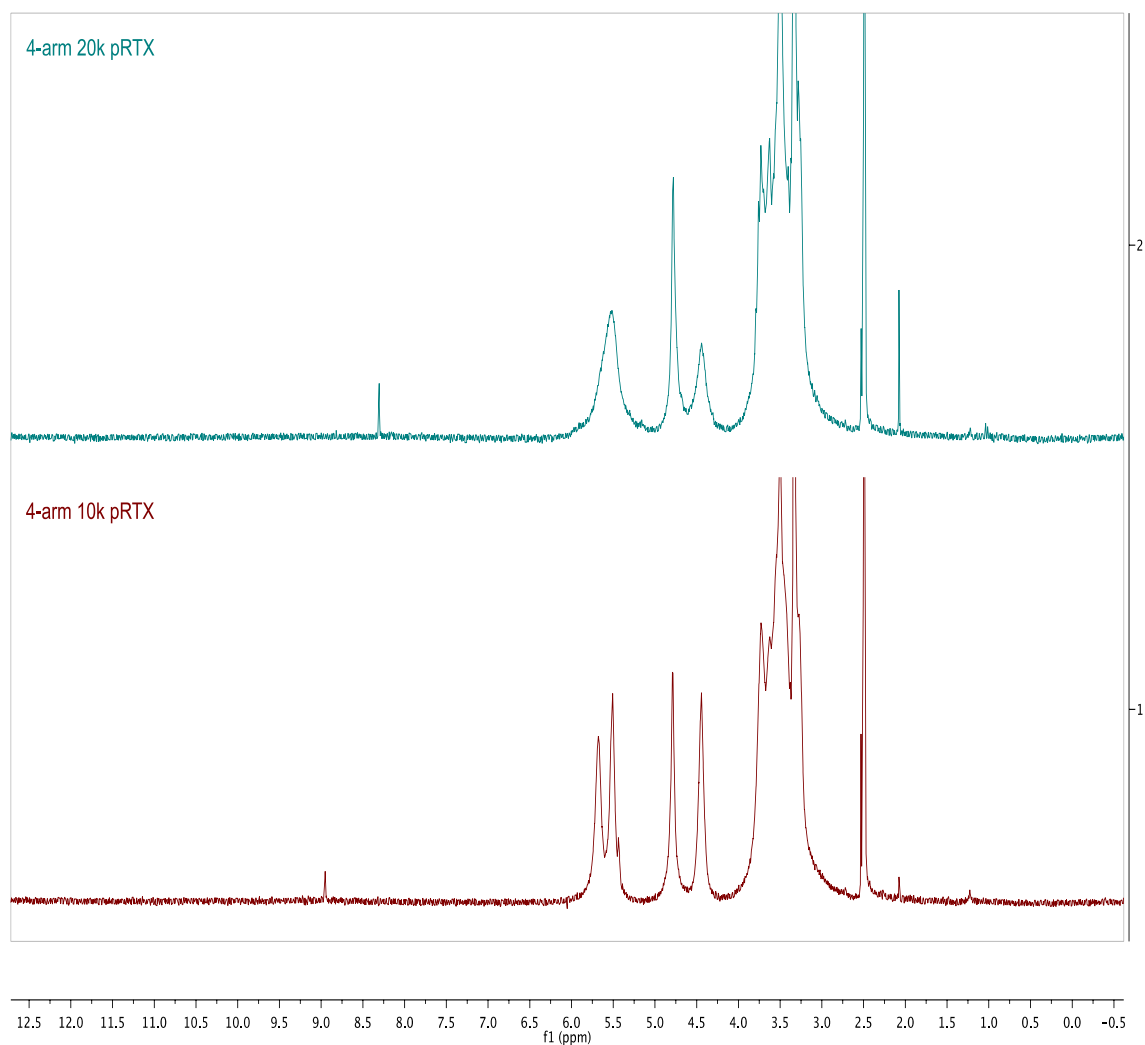

**Figure S1:** NMR spectra (Varian, 300 MHz) of 10k and 20k 4-arm bPRTx in DMSO-D6.

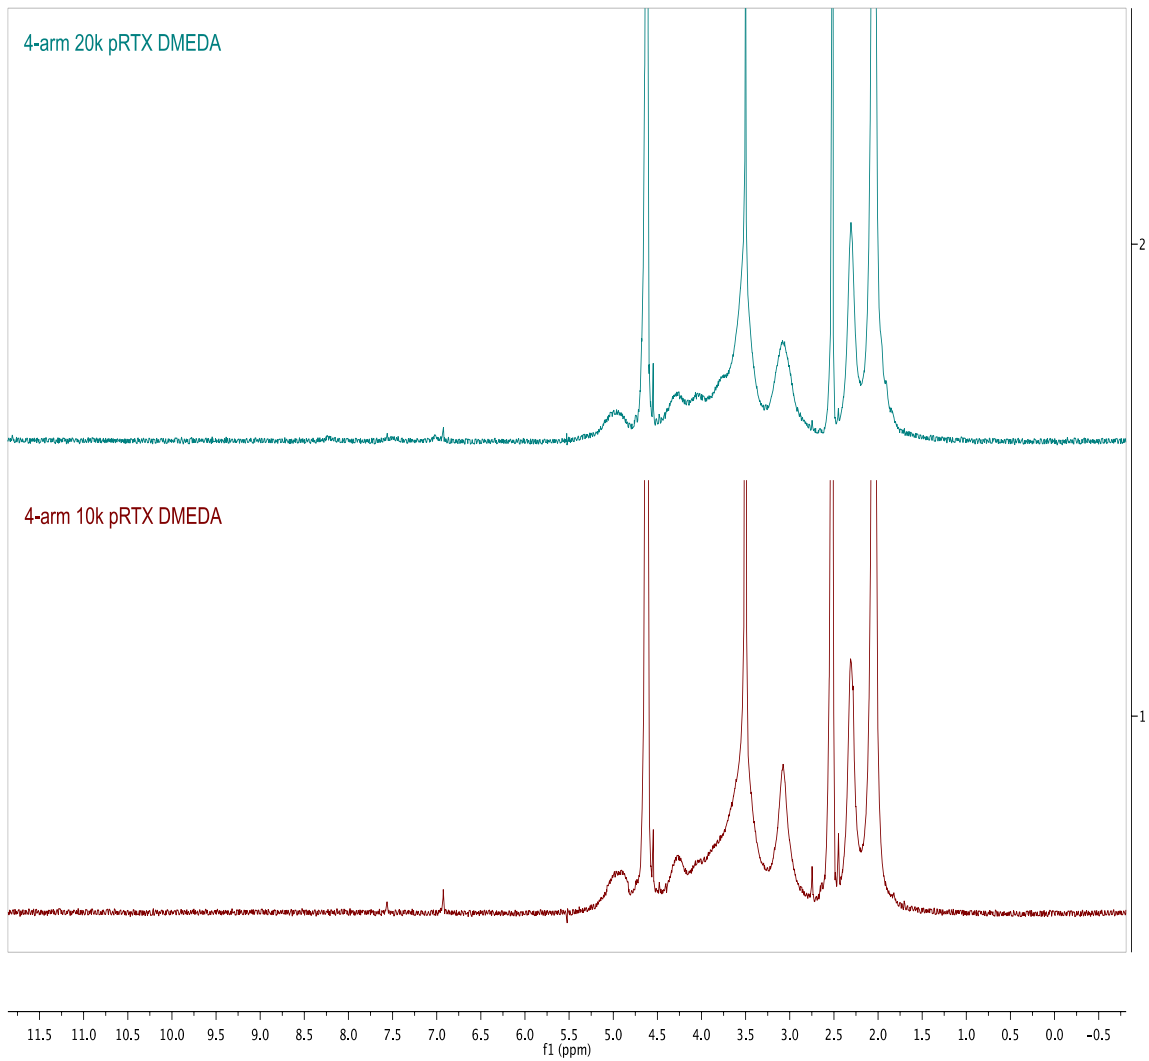

**Figure S2:** NMR spectra (Varian, 300 MHz) of 10k and 20k 4-arm bPRTx DMEDA in D<sub>2</sub>O.

## Gel Shift Assay

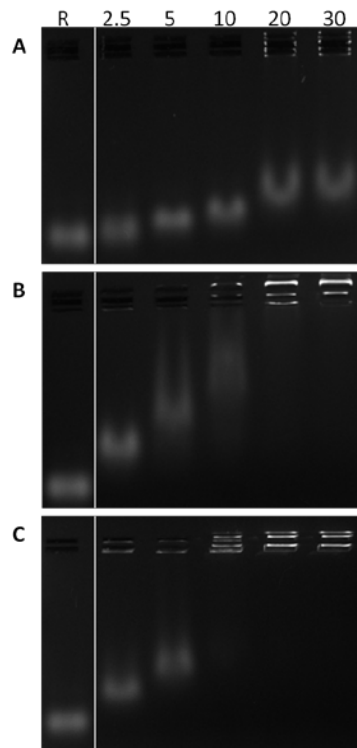

**Figure S3:** Gel shift assay showing complexation of (A) bPEI:siRNA, (B) 10k and (C) 20k bPRTx<sup>+</sup>. R represents free siRNA as a control.

## MTS Assay with bPEI and bPRTx<sup>+</sup>

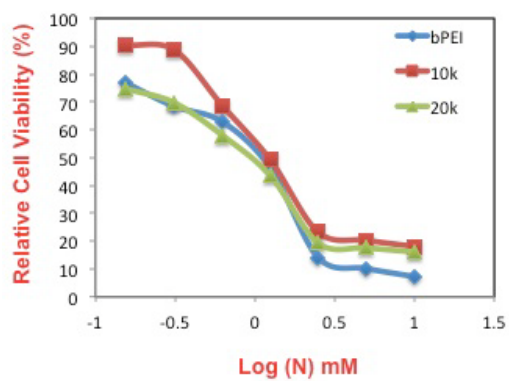

**Figure S4:** MTS assay of bPEI and bPRTx<sup>+</sup> performed in NIH3T3-GFP cells.

## LDH Release Assay with bPEI and bPRTx<sup>+</sup> complexes of siRNA

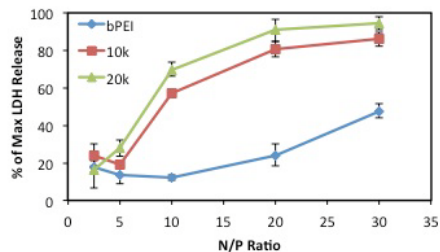

**Figure S5:** LDH release assay of bPEI:siRNA and bPRTx<sup>+</sup>:siRNA complexes performed in NIH3T3-GFP cells.

## N/P Ratio Screen of Complexes

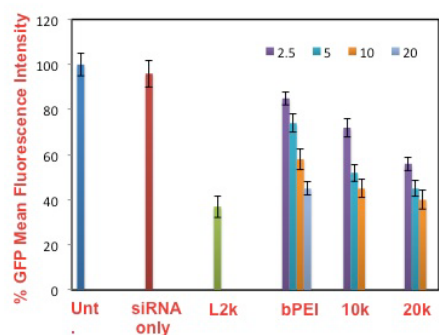

**Figure S6:** N/P ratio screen of bPRTx<sup>+</sup>:siRNA, bPEI:siRNA complexes in NIH3T3-GFP cells. 4h incubation, with 90 pmol of siRNA followed by readout after 24h.

## Representative FACS Raw Data

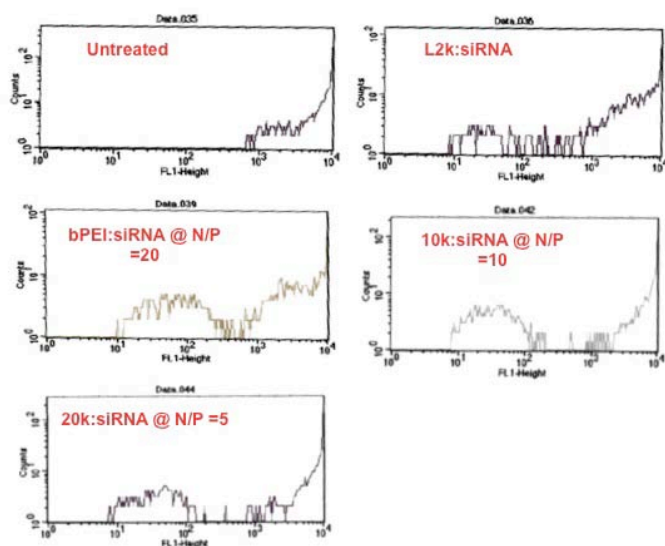

**Figure S7:** Representative FACS Histogram plots showing shift in GFP fluorescent cells after treatment with 90 pmol of Anti-GFP siRNA with L2k; bPEI; 10k and 20k.
